# Supplementary material for: Substituent effects of AIE-active α-cyanostilbene-containing triphenylamine derivatives on electrofluorochromic behavior
Source: Royal Society of Chemistry journal article supplement (doi:10.1039/c9nr02692d), 2019-01-01
Supplement: c9nr02692d1.pdf [file c9nr02692d1.pdf]

## Supplementary Information

### **Substituent Effects of AIE-Active $\alpha$ -Cyanostilbene-Containing Triphenylamine Derivatives on Electrofluorochromic Behaviors**

*Sin-Yu Chen*<sup>a</sup>, *Ya-Wen Chiu*<sup>a, b</sup>, *Guey-Sheng Liou*<sup>a, b\*</sup>

<sup>a</sup> Institute of Polymer Science and Engineering, National Taiwan University, Taipei 10617, Taiwan. Email: [gsliou@ntu.edu.tw](mailto:gsliou@ntu.edu.tw)

<sup>b</sup> Advanced Research Center for Green Materials Science and Technology, National Taiwan University, Taipei 10617, Taiwan.

## List of Contents for Supporting Information:

|                                                                                                                                                                                                                                                                                                                                                                                                                                                                                       |     |
|---------------------------------------------------------------------------------------------------------------------------------------------------------------------------------------------------------------------------------------------------------------------------------------------------------------------------------------------------------------------------------------------------------------------------------------------------------------------------------------|-----|
| <b>Experimental section</b> .....                                                                                                                                                                                                                                                                                                                                                                                                                                                     | S4  |
| <b>Characterization</b> .....                                                                                                                                                                                                                                                                                                                                                                                                                                                         | S5  |
| <b>Scheme S1.</b> Synthetic routes of <b>TPA-CN</b> , <b>TPA-CNBr</b> , <b>diOMe-TPA-CN</b> and <b>diOMe-TPA-CNBr</b> . .....                                                                                                                                                                                                                                                                                                                                                         | S6  |
| <b>Figure S1.</b> Fabricating procedure of the gel-type EFC devices. ....                                                                                                                                                                                                                                                                                                                                                                                                             | S7  |
| <b>Figure S2.</b> $^1\text{H}$ -NMR spectrum of <b>diOMe-TPA-CN</b> in $\text{DMSO-}d_6$ . ....                                                                                                                                                                                                                                                                                                                                                                                       | S8  |
| <b>Figure S3.</b> $^1\text{H}$ - $^1\text{H}$ COSY spectrum of <b>diOMe-TPA-CN</b> in $\text{DMSO-}d_6$ . ....                                                                                                                                                                                                                                                                                                                                                                        | S8  |
| <b>Figure S4.</b> $^{13}\text{C}$ -NMR spectrum of <b>diOMe-TPA-CN</b> in $\text{DMSO-}d_6$ . ....                                                                                                                                                                                                                                                                                                                                                                                    | S9  |
| <b>Figure S5.</b> $^1\text{H}$ - $^{13}\text{C}$ HSQC spectrum of <b>diOMe-TPA-CN</b> in $\text{DMSO-}d_6$ . ....                                                                                                                                                                                                                                                                                                                                                                     | S9  |
| <b>Figure S6.</b> (a) Photos of <b>TPA-CN</b> taken under UV light in different water/DMSO fractions. (b) PL spectra of <b>TPA-CN</b> in DMSO and water/DMSO mixtures with different water fractions ( $f_w$ ). (c) Plot of relative emission intensity ( $I/I_0$ ) versus the composition of aqueous mixtures of <b>TPA-CN</b> . $I_0$ = Emission intensity in pure DMSO solution. Solution concentration: 10 $\mu\text{M}$ ; $\lambda_{\text{ex}}$ : 396 nm. ....                   | S10 |
| <b>Figure S7.</b> (a) Photos of <b>TPA-CNBr</b> taken under UV light in different water/DMSO fractions. (b) PL spectra of <b>TPA-CNBr</b> in DMSO and water/DMSO mixtures with different water fractions ( $f_w$ ). (c) Plot of relative emission intensity ( $I/I_0$ ) versus the composition of aqueous mixtures of <b>TPA-CNBr</b> . $I_0$ = Emission intensity in pure DMSO solution. Solution concentration: 10 $\mu\text{M}$ ; $\lambda_{\text{ex}}$ : 402 nm. ....             | S10 |
| <b>Figure S8.</b> (a) Photos of <b>diOMe-TPA-CN</b> taken under UV light in different water/DMSO fractions. (b) PL spectra of <b>diOMe-TPA-CN</b> in DMSO and water/DMSO mixtures with different water fractions ( $f_w$ ). (c) Plot of relative emission intensity ( $I/I_0$ ) versus the composition of aqueous mixtures of <b>diOMe-TPA-CN</b> . $I_0$ = Emission intensity in pure DMSO solution. Solution concentration: 10 $\mu\text{M}$ ; $\lambda_{\text{ex}}$ : 415 nm. .... | S11 |
| <b>Figure S9.</b> Absorbance spectra of gel-type EFC devices based on 0.75 $\mu\text{mole}$ (a) <b>diOMe-TPA-CN</b> and (b) <b>diOMe-TPA-CNBr</b> and 0.75 $\mu\text{mole}$ HV at the applied potential from 0–1.8 V. ....                                                                                                                                                                                                                                                            | S12 |
| <b>Figure S10.</b> Absorbance spectra of gel-type EFC devices based on (a) 0.75 $\mu\text{mole}$ /1.5 $\mu\text{mole}$ <b>diOMe-TPA-CN</b> /HV and (b) 1.5 $\mu\text{mole}$ /1.5 $\mu\text{mole}$ <b>diOMe-TPA-CN</b> /HV at the applied potential from 0–1.8 V. ....                                                                                                                                                                                                                 | S12 |
| <b>Figure S11.</b> Cyclic voltammograms of gel-typed EFC devices based on (a) <b>diOMe-TPA-CN</b> , (b) <b>diOMe-TPA-CNBr</b> , (c) <b>diOMe-TPA-CN</b> with HV and (c) <b>diOMe-TPA-CNBr</b> with HV. Devices are ITO glasses with $2\times 2\text{ cm}^2$                                                                                                                                                                                                                           |     |

|                                                                                                                                                 |     |
|-------------------------------------------------------------------------------------------------------------------------------------------------|-----|
| active area containing 0.75 $\mu$ mole EFC materials in about 0.05 mL PC and<br>0.75 $\mu$ mole HV with 5 $\mu$ mole TBABF <sub>4</sub> . ..... | S13 |
| <b>Table S1.</b> Crystal data and experimental details for <b>TPA-CN</b> . .....                                                                | S14 |
| <b>Table S2.</b> Crystal data and experimental details for <b>diOMe-TPA-CN</b> . .....                                                          | S15 |
| <b>Table S3.</b> Crystal data and experimental details for <b>diOMe-TPA-CNBr</b> . .....                                                        | S16 |
| <b>Table S4</b> Solubility test of <b>diOMe-TPA-CN</b> and <b>diOMe-TPA-CNBr</b> in PC. ....                                                    | S17 |

---

## Experimental section

### *Monomer synthesis*

Aldehyde derivatives (**TPA-CHO** and **diOMe-TPA-CHO**) and phenylacetonitrile (or 4-bromophenylacetonitrile) were used to synthesize the AIE-active  $\alpha$ -cyanostilbene-containing triphenylamine luminogens (**TPA-CN**, **diOMe-TPA-CN**, **TPA-CNBr** and **diOMe-TPA-CNBr**), respectively, by the Knoevenagel condensation as shown in **Scheme S1**. Take **TPA-CN** as an instance, a solution of potassium hydroxide (KOH, 0.17 g, 3.0 mmol) in 10 mL ethanol was added dropwise to the mixture of **TPA-CHO** (0.55 g, 2.0 mmol) and phenylacetonitrile (0.35 g, 3.0 mmol) in ethanol (10 mL) at room temperature. After stirring for 24 h, bright yellow solid was obtained during the reaction, the resulting crude product was dried to afford a yellow solid (0.65 g, 87%) and purified by recrystallization. **TPA-CN**: mp 154–156 °C;  $^1\text{H}$  NMR (400 MHz, DMSO- $d_6$ ,  $\delta$ ): 7.88 (t, 3H), 7.72 (d, 2H), 7.49 (t, 2H), 7.37–7.42 (m, 5H), 7.14–7.20 (m, 6H), 6.96 (d, 2H). **TPA-CNBr**: mp 159–161 °C;  $^1\text{H}$ -NMR (400 MHz, DMSO- $d_6$ ,  $\delta$ ): 7.92 (s, 1H), 7.86 (d, 2H), 7.68 (d, 4H), 7.40 (t, 4H), 7.14–7.22 (m, 6H), 6.96 (d, 2H). **diOMe-TPA-CN**: mp 132.0–133.6 °C;  $^1\text{H}$ -NMR (400 MHz, DMSO- $d_6$ ,  $\delta$ ): 7.84 (s, 1H), 7.80 (d, 2H), 7.70 (d, 2H), 7.48 (t, 2H), 7.39 (t, 1H), 7.16 (d, 4H), 6.99 (d, 4H), 6.75 (d, 2H), 3.77 (s, 6H).  $^{13}\text{C}$ -NMR (100 MHz, DMSO- $d_6$ ,  $\delta$ ): 157.1 (C2), 150.9 (C6), 142.6 (C10), 139.0 (C5), 134.9 (C13), 131.2 (C8), 129.4 (C15), 128.7 (C16), 128.2 (C4), 125.6 (C14), 124.5 (C9), 119.1 (C12), 117.1 (C7), 115.5 (C3), 105.3 (C11), 55.63 (C1). Anal. calcd. for  $\text{C}_{29}\text{H}_{24}\text{N}_2\text{O}_2$ : C 80.53; H 5.59; N 6.48; found: C 80.35; H 5.62; N 6.48. **diOMe-TPA-CNBr**: mp 146–149 °C;  $^1\text{H}$ -NMR (400 MHz, DMSO- $d_6$ ,  $\delta$ ): 7.89 (s, 1H), 7.80 (d, 2H), 7.67 (d, 4H), 7.17 (d, 4H), 6.99 (d, 4H), 6.74 (d, 2H), 3.78 (s, 6H).

## Characterization

OptiMelt-Automated Melting Point System and differential scanning calorimetry (DSC) were used to detect the melting point of the synthesized compounds and their scan rates are both 10 °C/min. <sup>1</sup>H and <sup>13</sup>C NMR spectra were measured on a Bruker DPX-400 MHz FT-NMR using chloroform-D (CDCl<sub>3</sub>) and dimethyl sulfoxide (DMSO-*d*<sub>6</sub>) as solvents and tetramethylsilane (TMS; δ = 0 ppm) was chosen as internal reference. In addition, peak multiplicity was marked as follow: s, singlet; d, doublet; t, triplet; m, multiplet. Fourier transform infrared (FT-IR) spectra were recorded using a PerkinElmer Spectrum 100 Model FT-IR spectrometer by incorporating samples in potassium bromide (KBr) disks. Elemental analysis (EA) was performed using a Heraeus VarioEL-III CHNS element analyzer. Electrochemistry was carried out with a CH Instruments 611B electrochemical analyzer. Voltammograms are presented with the positive potential pointing to the right and with increasing anodic currents pointing upwards. Cyclic voltammetry (CV) was conducted with the optically transparent thin layer electrochemical (OTTLE) cell and Ag/AgCl, KCl (sat.) was served as reference electrode. Spectroelectrochemistry was conducted in a 1 cm quartz cell by means of Hewlett–Packard 8453 UV-vis diode array spectrophotometer. The ITO-coated glass was used as working electrode, and a platinum wire and an Ag/AgCl cell were served for the counter electrode and reference electrode, respectively. PL quantum yield ( $\Phi_F$ ) of materials in different solvents was measured by using quinine sulfate dissolved in 1 N sulfuric acid as a reference standard ( $\Phi_F = 0.546$ ), and the  $\Phi_F$  of small molecules in solid state was measured by a calibrated integrating sphere.

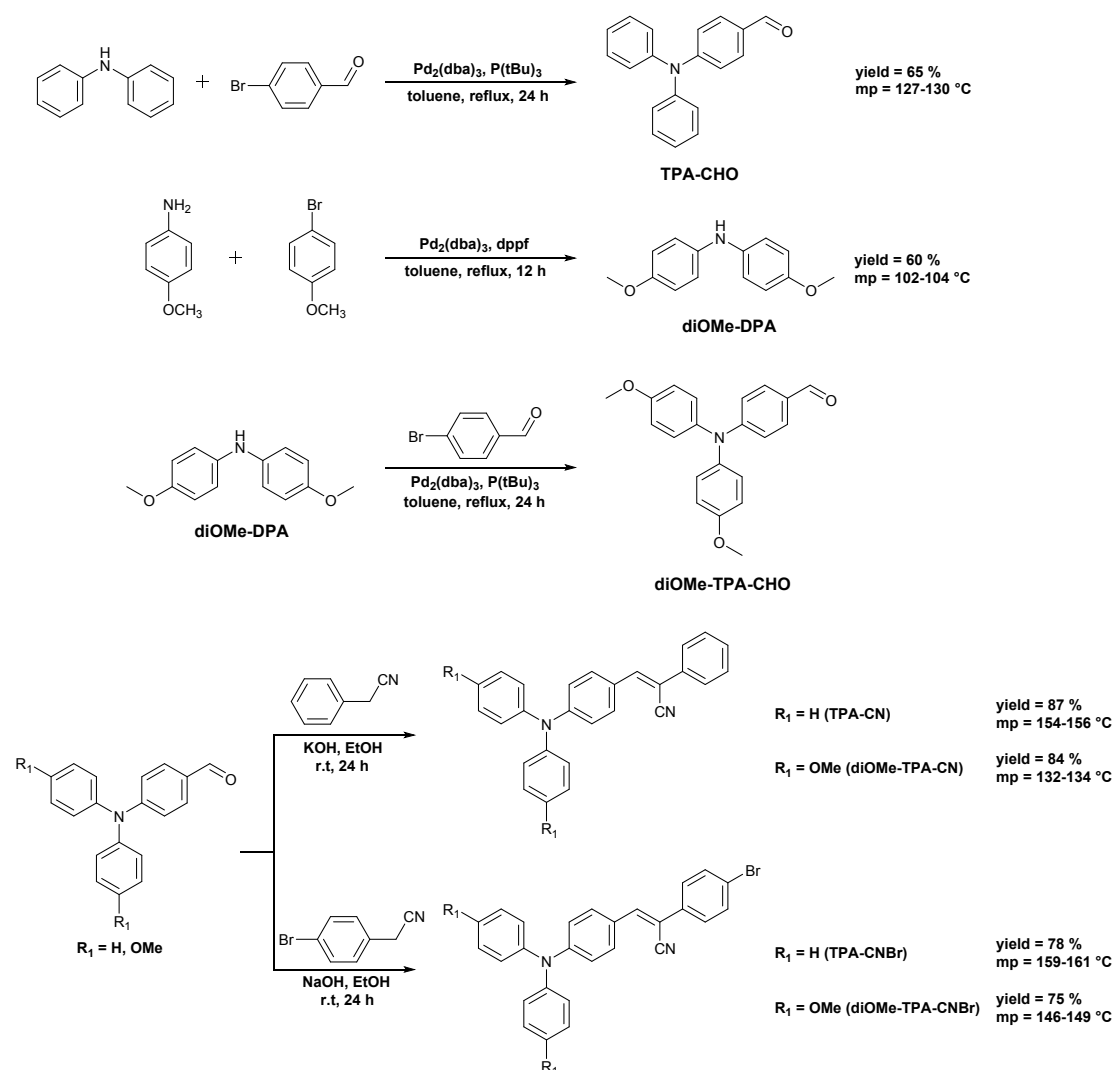

**Scheme S1** Synthetic routes of **TPA-CN**, **TPA-CNBr**, **diOMe-TPA-CN** and **diOMe-TPA-CNBr**.

## Fabrication of Gel-Type EFC devices

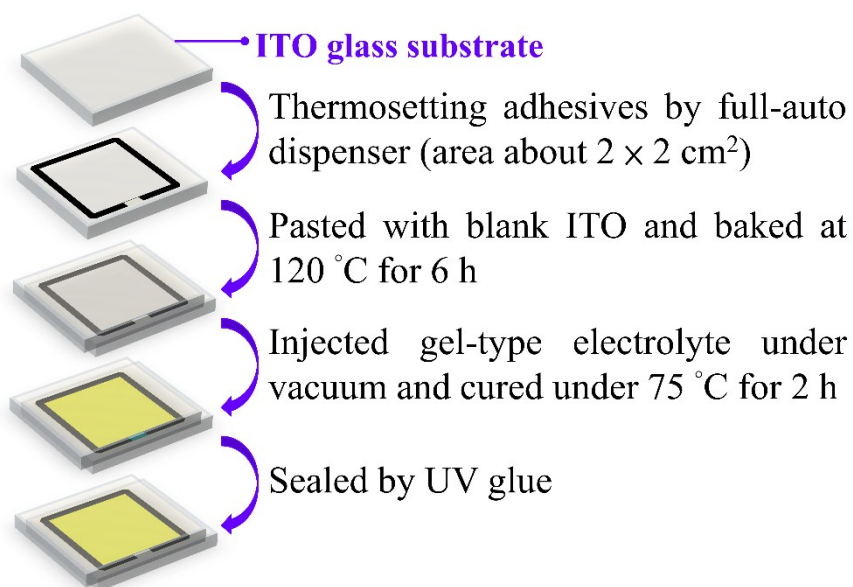

**Figure S1** Fabricating procedure of the gel-type EFC devices.

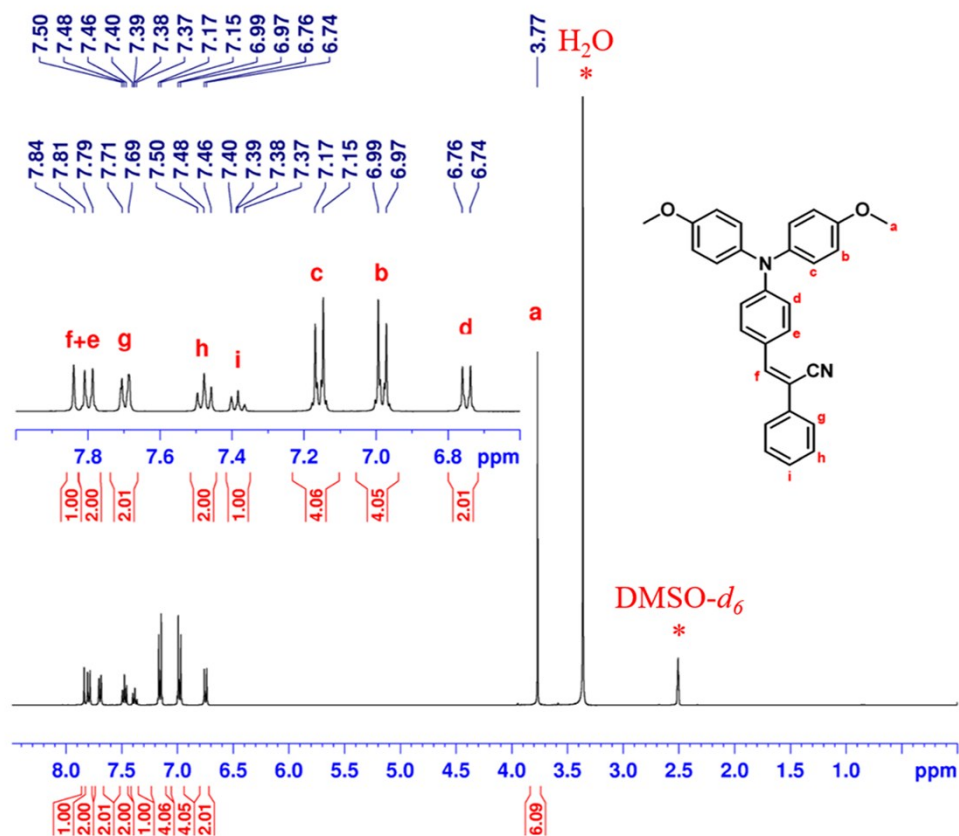

**Figure S2.** <sup>1</sup>H-NMR spectrum of diOMe-TPA-CN in DMSO-*d*<sub>6</sub>.

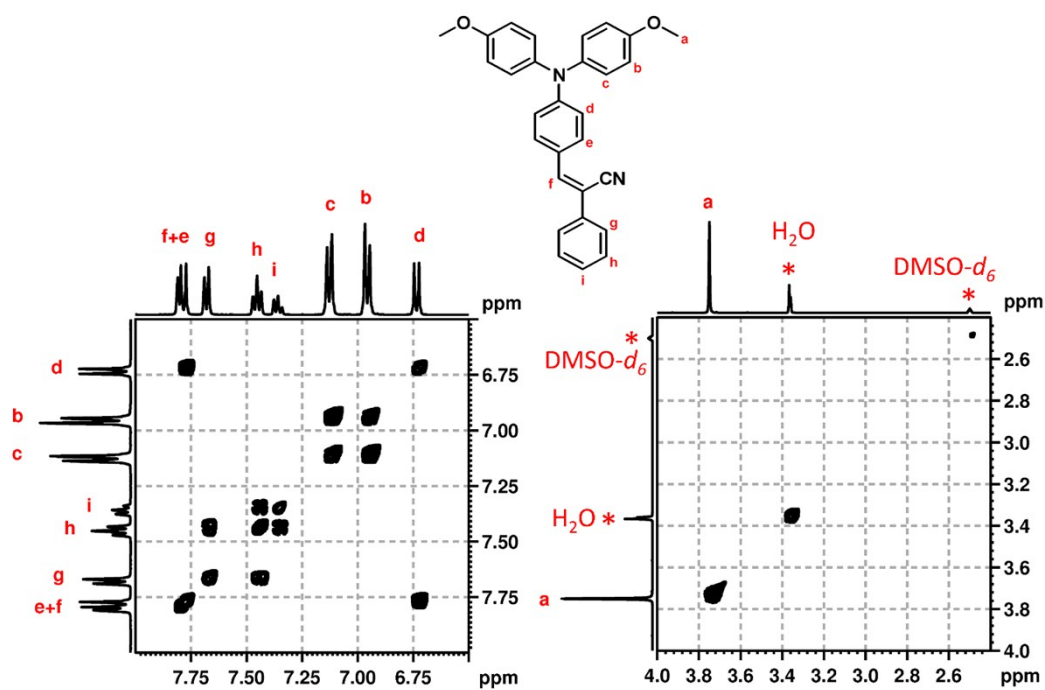

**Figure S3.** <sup>1</sup>H-<sup>1</sup>H COSY spectra of diOMe-TPA-CN in DMSO-*d*<sub>6</sub>.

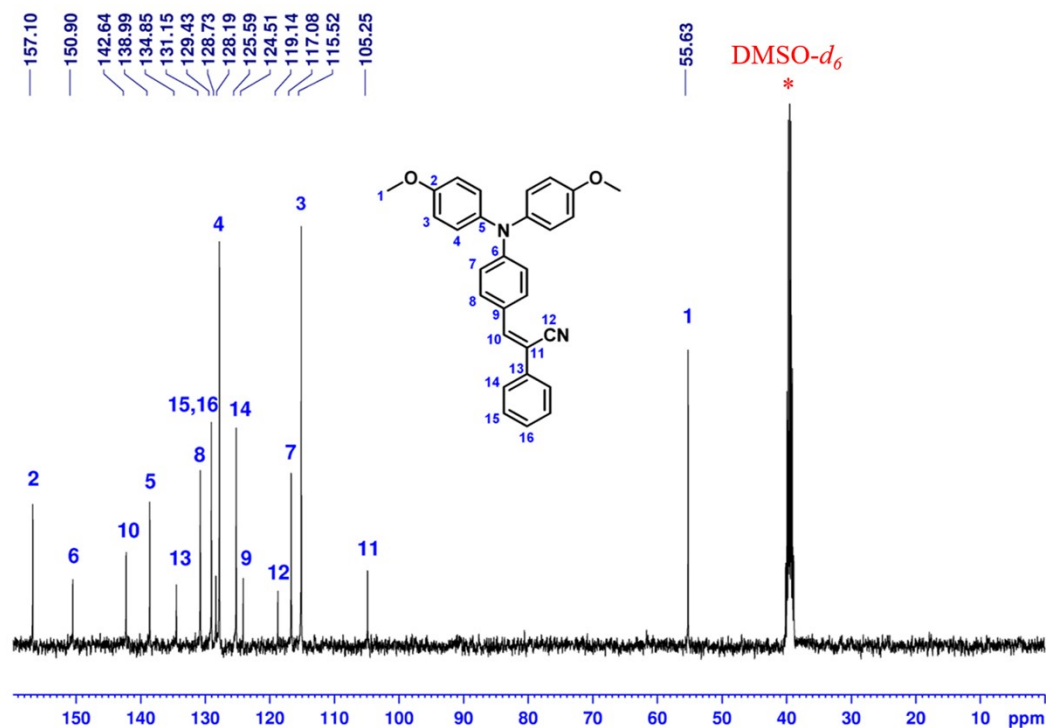

Figure S4.  $^{13}\text{C}$ -NMR spectrum of diOMe-TPA-CN in  $\text{DMSO-}d_6$ .

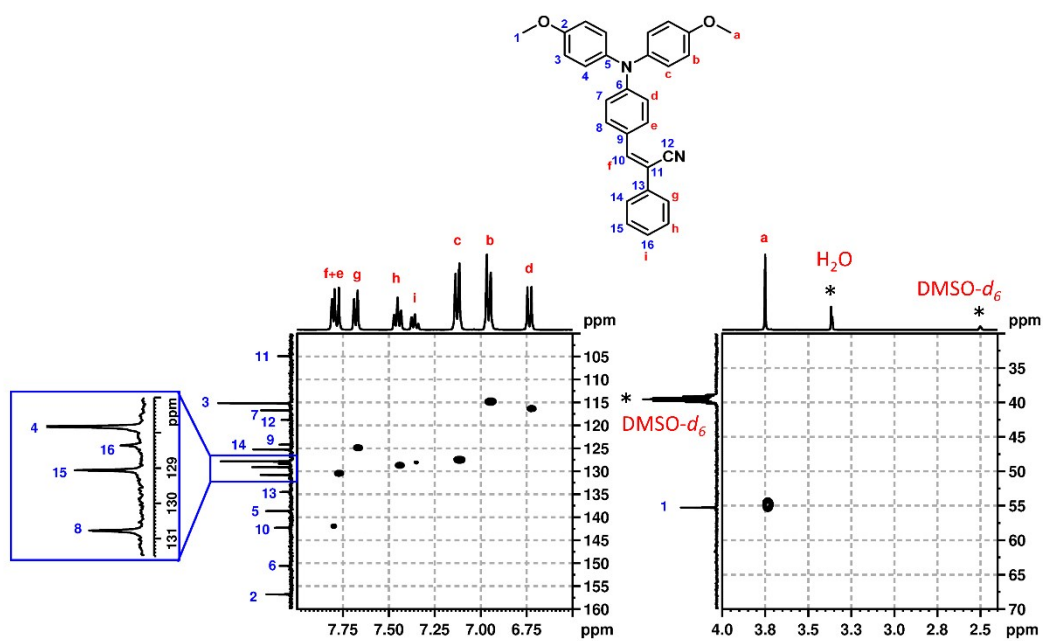

Figure S5.  $^1\text{H}$ - $^{13}\text{C}$  HSQC spectrum of diOMe-TPA-CN in  $\text{DMSO-}d_6$ .

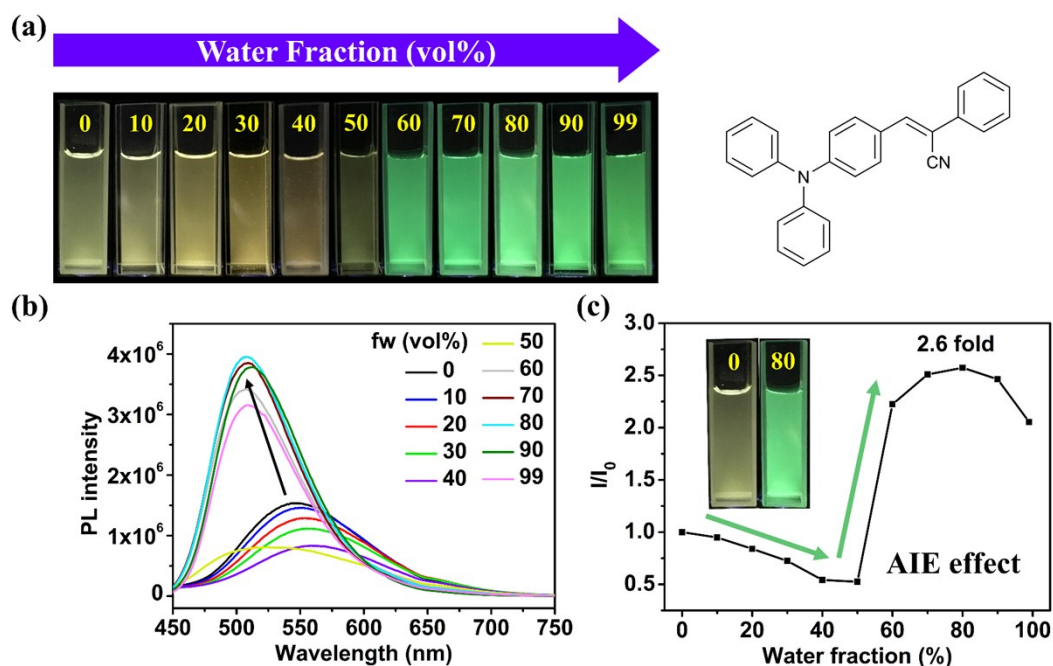

**Figure S6** (a) Photos of TPA-CN taken under UV light at different water/DMSO fractions, (b) PL spectra of TPA-CN in water/DMSO mixtures with different water fractions ( $f_w$ ). (c) Plot of relative emission intensity ( $I/I_0$ ) versus the composition of aqueous mixtures of TPA-CN.  $I_0$  = Emission intensity in pure DMSO solution. Solution concentration: 10  $\mu$ M;  $\lambda_{ex}$ : 396 nm.

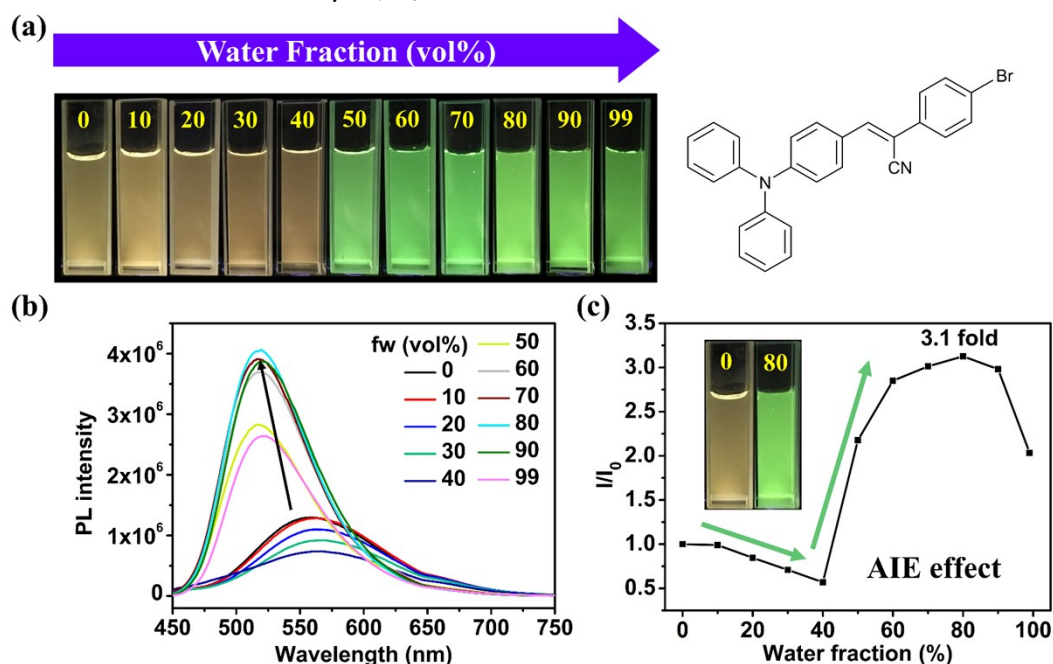

**Figure S7.** (a) Photos of TPA-CNBr taken under UV light at different water/DMSO fractions, (b) PL spectra of TPA-CNBr in DMSO and water/DMSO mixtures with different water fractions ( $f_w$ ). (c) Plot of relative emission intensity ( $I/I_0$ ) versus the composition of aqueous mixtures of TPA-CNBr.  $I_0$  = Emission intensity in pure DMSO solution. Solution concentration: 10  $\mu$ M;  $\lambda_{ex}$ : 402 nm.

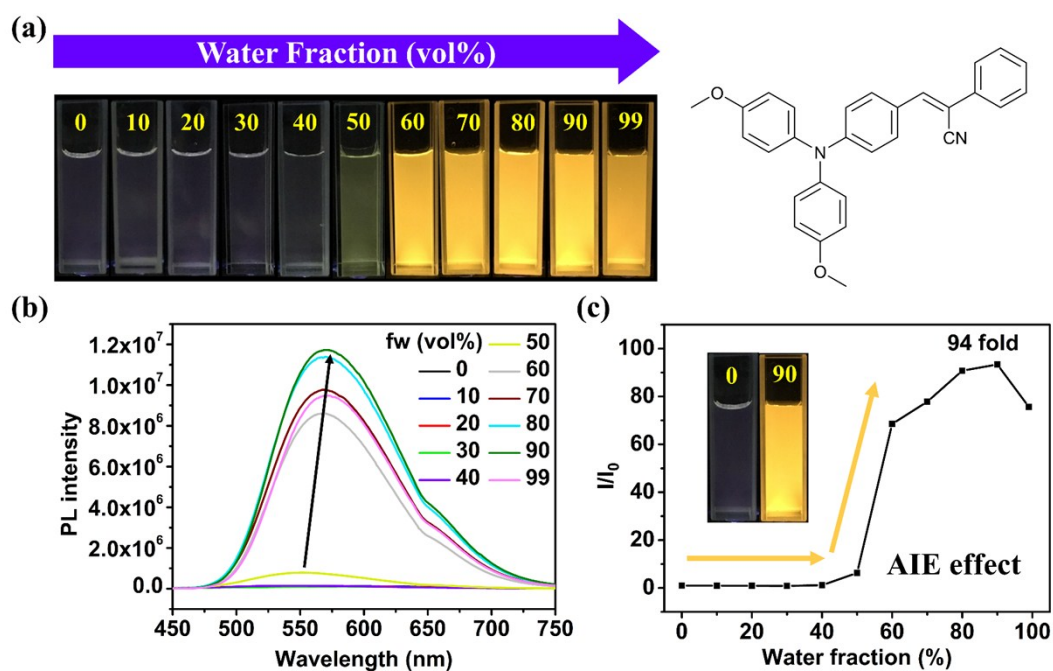

**Figure S8.** (a) Photos of **diOMe-TPA-CN** taken under UV light at different water/DMSO fractions, (b) PL spectra of **diOMe-TPA-CN** in DMSO and water/DMSO mixtures with different water fractions ( $f_w$ ). (c) Plot of relative emission intensity ( $I/I_0$ ) versus the composition of aqueous mixtures of **diOMe-TPA-CN**.  $I_0$  = Emission intensity in pure DMSO solution. Solution concentration: 10  $\mu\text{M}$ ;  $\lambda_{\text{ex}}$ : 415 nm.

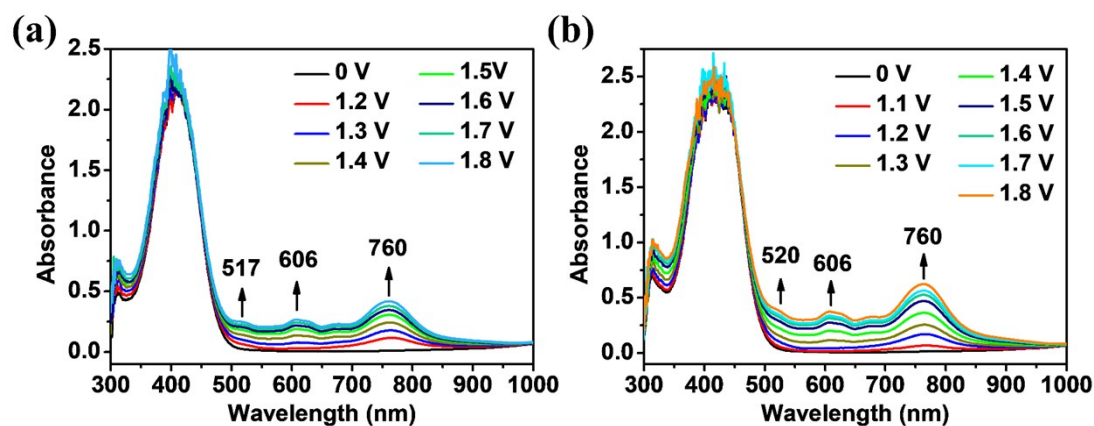

**Figure S9.** Absorbance spectra of gel-type EFC devices based on 0.75  $\mu\text{mole}$  (a) **diOMe-TPA-CN** and (b) **diOMe-TPA-CNBr** with 0.75  $\mu\text{mole}$  HV at the applied potential of 0–1.8 V.

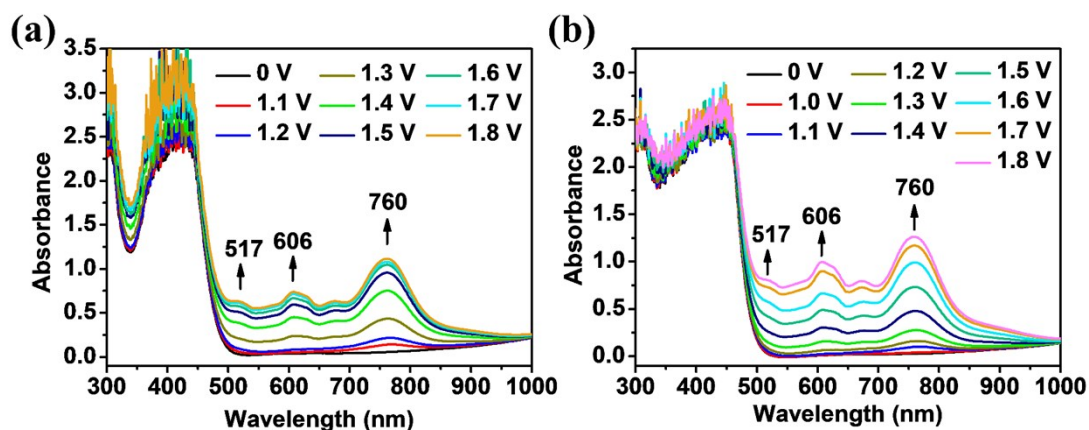

**Figure S10.** Absorbance spectra of gel-type EFC devices based on (a) 0.75  $\mu\text{mole}$ /1.5  $\mu\text{mole}$  **diOMe-TPA-CN/HV** and (b) 1.5  $\mu\text{mole}$ /1.5  $\mu\text{mole}$  **diOMe-TPA-CN/HV** at the applied potential of 0–1.8 V.

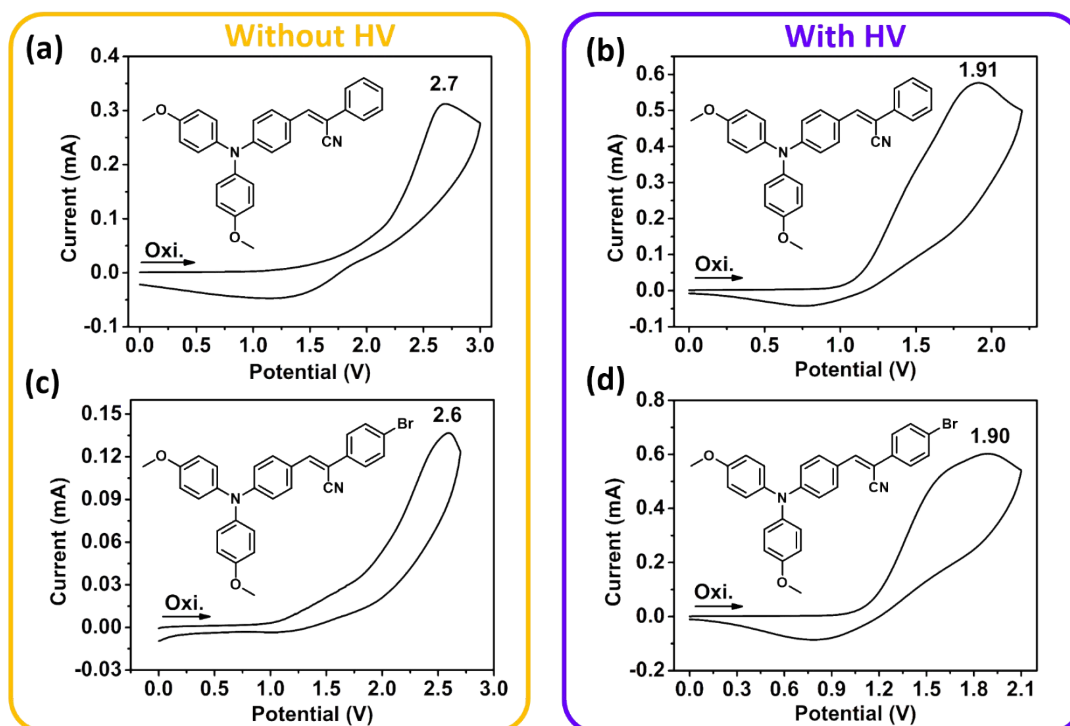

**Figure S11.** Cyclic voltammograms of gel-typed EFC devices based on (a) **diOMe-TPA-CN**, (b) **diOMe-TPA-CNBr**, (c) **diOMe-TPA-CN** with HV and (c) **diOMe-TPA-CNBr** with HV. Devices are ITO glasses with  $2 \times 2 \text{ cm}^2$  active area containing  $0.75 \text{ } \mu\text{mol}$  EFC materials in about  $0.05 \text{ mL}$  PC and  $0.75 \text{ } \mu\text{mol}$  HV with  $5 \text{ } \mu\text{mol}$  TBABF<sub>4</sub>.

**Table S1.** Single Crystal data and experimental details for **TPA-CN**.

| Compound                           | TPA-CN                                                                                                                                |
|------------------------------------|---------------------------------------------------------------------------------------------------------------------------------------|
| Empirical formula                  | C <sub>27</sub> H <sub>20</sub> N <sub>2</sub>                                                                                        |
| Formula weight                     | 372.45                                                                                                                                |
| Crystal system                     | Monoclinic                                                                                                                            |
| Space group                        | P 1 2 <sub>1</sub> /n 1                                                                                                               |
| Unit cell dimensions               | a = 16.9323(5) Å<br>b = 6.68910(10) Å<br>c = 19.8297(6) Å<br>$\alpha = 90^\circ$<br>$\beta = 111.138(4)^\circ$<br>$\gamma = 90^\circ$ |
| Volume                             | 2094.83(9) Å <sup>3</sup>                                                                                                             |
| Z                                  | 4                                                                                                                                     |
| F(000)                             | 784                                                                                                                                   |
| Density (calculated)               | 1.181 Mg/m <sup>3</sup>                                                                                                               |
| Wavelength                         | 1.54178 Å                                                                                                                             |
| Cell parameters reflections used   | 5172                                                                                                                                  |
| Theta range for Cell parameters    | 4.2840 to 77.3900°                                                                                                                    |
| Absorption coefficient             | 0.532 mm <sup>-1</sup>                                                                                                                |
| Temperature                        | 150(2) K                                                                                                                              |
| Crystal size                       | 0.25 × 0.25 × 0.20 mm <sup>3</sup>                                                                                                    |
| Diffractometer                     | Xcalibur, Atlas, Gemini                                                                                                               |
| Absorption correction              | Semi-empirical from equivalents                                                                                                       |
| Max. and min. transmission         | 1.00000 and 0.95017                                                                                                                   |
| No. of measured reflections        | 8885                                                                                                                                  |
| No. of independent reflections     | 3800 [R(int) = 0.0237]                                                                                                                |
| No. of observed [I>2 $\sigma$ (I)] | 3194                                                                                                                                  |
| Completeness to theta = 68.00°     | 99.9 %                                                                                                                                |
| Theta range for data collection    | 2.95 to 68.00°                                                                                                                        |
| Final R indices [I>2 $\sigma$ (I)] | R1 = 0.0445, wR2 = 0.1200                                                                                                             |
| R indices (all data)               | R1 = 0.0524, wR2 = 0.1281                                                                                                             |
| Goodness-of-fit on F <sup>2</sup>  | 1.018                                                                                                                                 |
| No. of reflections                 | 3800                                                                                                                                  |
| No. of parameters                  | 262                                                                                                                                   |
| No. of restraints                  | 0                                                                                                                                     |
| Largest diff. peak and hole        | 0.162 and -0.224 e.Å <sup>-3</sup>                                                                                                    |

**Table S2.** Single Crystal data and experimental details for **diOMe-TPA-CN**.

| Compound                          | <b>diOMe-TPA-CN</b>                                                                                                                  |
|-----------------------------------|--------------------------------------------------------------------------------------------------------------------------------------|
| Empirical formula                 | C <sub>29</sub> H <sub>24</sub> N <sub>2</sub> O <sub>2</sub>                                                                        |
| Formula weight                    | 432.50                                                                                                                               |
| Temperature                       | 200(2) K                                                                                                                             |
| Wavelength                        | 1.54178 Å                                                                                                                            |
| Crystal system                    | Monoclinic                                                                                                                           |
| Space group                       | P 1 2 <sub>1</sub> /c 1                                                                                                              |
| Unit cell dimensions              | a = 10.8798(4) Å<br>b = 11.8215(4) Å<br>c = 35.5224(13) Å<br>$\alpha = 90^\circ$<br>$\beta = 90.737(4)^\circ$<br>$\gamma = 90^\circ$ |
| Volume                            | 4568.4(3) Å <sup>3</sup>                                                                                                             |
| Z                                 | 8                                                                                                                                    |
| Density (calculated)              | 1.258 Mg/m <sup>3</sup>                                                                                                              |
| Absorption coefficient            | 0.626 mm <sup>-1</sup>                                                                                                               |
| F(000)                            | 1824                                                                                                                                 |
| Crystal size                      | 0.25 × 0.20 × 0.15 mm <sup>3</sup>                                                                                                   |
| Theta range for data collection   | 3.94 to 67.98°                                                                                                                       |
| Index ranges                      | -12 ≤ h ≤ 13, -14 ≤ k ≤ 10, -39 ≤ l ≤ 42                                                                                             |
| Reflections collected             | 20248                                                                                                                                |
| Independent reflections           | 8316 [R(int) = 0.0419]                                                                                                               |
| Completeness to theta = 67.98°    | 100.0 %                                                                                                                              |
| Absorption correction             | Semi-empirical from equivalents                                                                                                      |
| Max. and min. transmission        | 1.00000 and 0.94975                                                                                                                  |
| Refinement method                 | Full-matrix least-squares on F <sup>2</sup>                                                                                          |
| Data / restraints / parameters    | 8316 / 0 / 595                                                                                                                       |
| Goodness-of-fit on F <sup>2</sup> | 1.015                                                                                                                                |
| Final R indices [I > 2σ(I)]       | R1 = 0.0506, wR2 = 0.1293                                                                                                            |
| R indices (all data)              | R1 = 0.0842, wR2 = 0.1542                                                                                                            |
| Largest diff. peak and hole       | 0.181 and -0.212 e.Å <sup>-3</sup>                                                                                                   |

**Table S3.** Single Crystal data and experimental details for **diOMe-TPA-CNBr**.

| Compound                          | diOMe-TPA-CNBr                                                                                                                     |
|-----------------------------------|------------------------------------------------------------------------------------------------------------------------------------|
| Empirical formula                 | C <sub>29</sub> H <sub>23</sub> Br N <sub>2</sub> O <sub>2</sub>                                                                   |
| Formula weight                    | 511.40                                                                                                                             |
| Temperature                       | 200(2) K                                                                                                                           |
| Wavelength                        | 1.54178 Å                                                                                                                          |
| Crystal system                    | Triclinic                                                                                                                          |
| Space group                       | P -1                                                                                                                               |
| Unit cell dimensions              | a = 11.2848(5) Å<br>b = 12.4618(5) Å<br>c = 17.9846(8) Å<br>$\alpha$ = 76.742(4)°<br>$\beta$ = 78.065(4)°<br>$\gamma$ = 83.320(4)° |
| Volume                            | 2402.22(18) Å <sup>3</sup>                                                                                                         |
| Z                                 | 4                                                                                                                                  |
| Density (calculated)              | 1.414 Mg/m <sup>3</sup>                                                                                                            |
| Absorption coefficient            | 2.560 mm <sup>-1</sup>                                                                                                             |
| F(000)                            | 1048                                                                                                                               |
| Crystal size                      | 0.400 × 0.120 × 0.060 mm <sup>3</sup>                                                                                              |
| Theta range for data collection   | 3.65 to 68.00°                                                                                                                     |
| Index ranges                      | -13 ≤ h ≤ 13, -14 ≤ k ≤ 14, -21 ≤ l ≤ 21                                                                                           |
| Reflections collected             | 19911                                                                                                                              |
| Independent reflections           | 8741 [R(int) = 0.0445]                                                                                                             |
| Completeness to theta = 68.00°    | 100.0 %                                                                                                                            |
| Absorption correction             | Semi-empirical from equivalents                                                                                                    |
| Max. and min. transmission        | 1.00000 and 0.60427                                                                                                                |
| Refinement method                 | Full-matrix least-squares on F <sup>2</sup>                                                                                        |
| Data / restraints / parameters    | 8741 / 0 / 613                                                                                                                     |
| Goodness-of-fit on F <sup>2</sup> | 1.014                                                                                                                              |
| Final R indices [I > 2σ(I)]       | R1 = 0.0462, wR2 = 0.1150                                                                                                          |
| R indices (all data)              | R1 = 0.0707, wR2 = 0.1322                                                                                                          |
| Largest diff. peak and hole       | 0.558 and -0.602 e.Å <sup>-3</sup>                                                                                                 |

**Table S4.** Solubility test<sup>a</sup> of **diOMe-TPA-CN** and **diOMe-TPA-CNBr** in PC.

|                       | 0.75 $\mu$ mole | 1.5 $\mu$ mole | 2.25 $\mu$ mole |
|-----------------------|-----------------|----------------|-----------------|
| <b>diOMe-TPA-CN</b>   | +               | +              | +               |
| <b>diOMe-TPA-CNBr</b> | +               | –              | –               |

<sup>a</sup>Qualitative solubility was tested under different amount of materials in 0.05 mL PC. +, soluble at room temperature; –, insoluble at room temperature.
